# Supplementary material for: Towards the Elucidation of Assimilative nasABC Operon Transcriptional Regulation in Haloferax mediterranei
Source: MDPI journal article supplement (doi:10.3390/genes12050619), 2021-04-22
Supplement: s1 [file s1]

**Table S1.** Oligonucleotides designed for sited directed mutagenesis of p.*nasABC* region and for obtaining biotinylated DNA samples.

| Oligonucleotide             | Sequence                                                | Target                                                                                         |
|-----------------------------|---------------------------------------------------------|------------------------------------------------------------------------------------------------|
| PAL1-1_for                  | GAGAAACCTTCTCACCGCG <b>AAA</b> ACCGGGTATA-<br>CAGGGACGC | Modification of palindromic sequence by<br>sited directed mutagenesis                          |
| PAL1-1_rev                  | GCGTCCCTGTATACCCGG <b>TTT</b> CGCGGTGA-<br>GAAGGTTTCTC  |                                                                                                |
| PAL1-2_for<br>p.nas_rev     | GGGACGCCCCGGTGGACCGCACGACG<br>ACCACACCCCATGGCACAGCGCAT  | Promoter amplification without palin-<br>dromic region                                         |
| PAL2-1_for                  | ATATTCTTAGTATACGTT <b>CTCGT</b> ATTGCACGA-<br>TATGGGGG  | Modification of putative consensus bind-<br>ing site sequence by sited directed<br>mutagenesis |
| PAL2-1_rev                  | CCCCCATATCGTGCAAT <b>ACGAG</b> AACGTATACTAA-<br>GAATAT  |                                                                                                |
| PAL2-2_for                  | GTATACGTTTGT <b>GGCCC</b> GCACGATATGGGGGAATT-<br>GGGCGG | Modification of putative consensus bind-<br>ing site sequence by sited directed<br>mutagenesis |
| PAL2-2_rev                  | CCGCCCAATTCCCCCATATCGTG <b>GGCC</b> ACAAAC-<br>GTATAC   |                                                                                                |
| pVA-for-Biot<br>N-bGal-rev  | GCTCGGAATTAACCTCACTAAAG<br>GCTCCGGGAAATAGCAGACAC        | Biotinylated p. <i>nasABC</i>                                                                  |
| p.fdx_for<br>p.fdx_rev-Biot | TACTTCGTACGCGCTGTTCT<br>GTTACCGTGGGCATCAACAA            | Biotinylated p. <i>fdx</i>                                                                     |
| Glc_for<br>Glc_rev-Biot     | GCATTGGTAAACATATGAAAGC<br>GTGAAGAAGCTGGACATGTAC         | Biotinylated glucose dehydrogenase                                                             |

The mutant sequences are shown in red color.

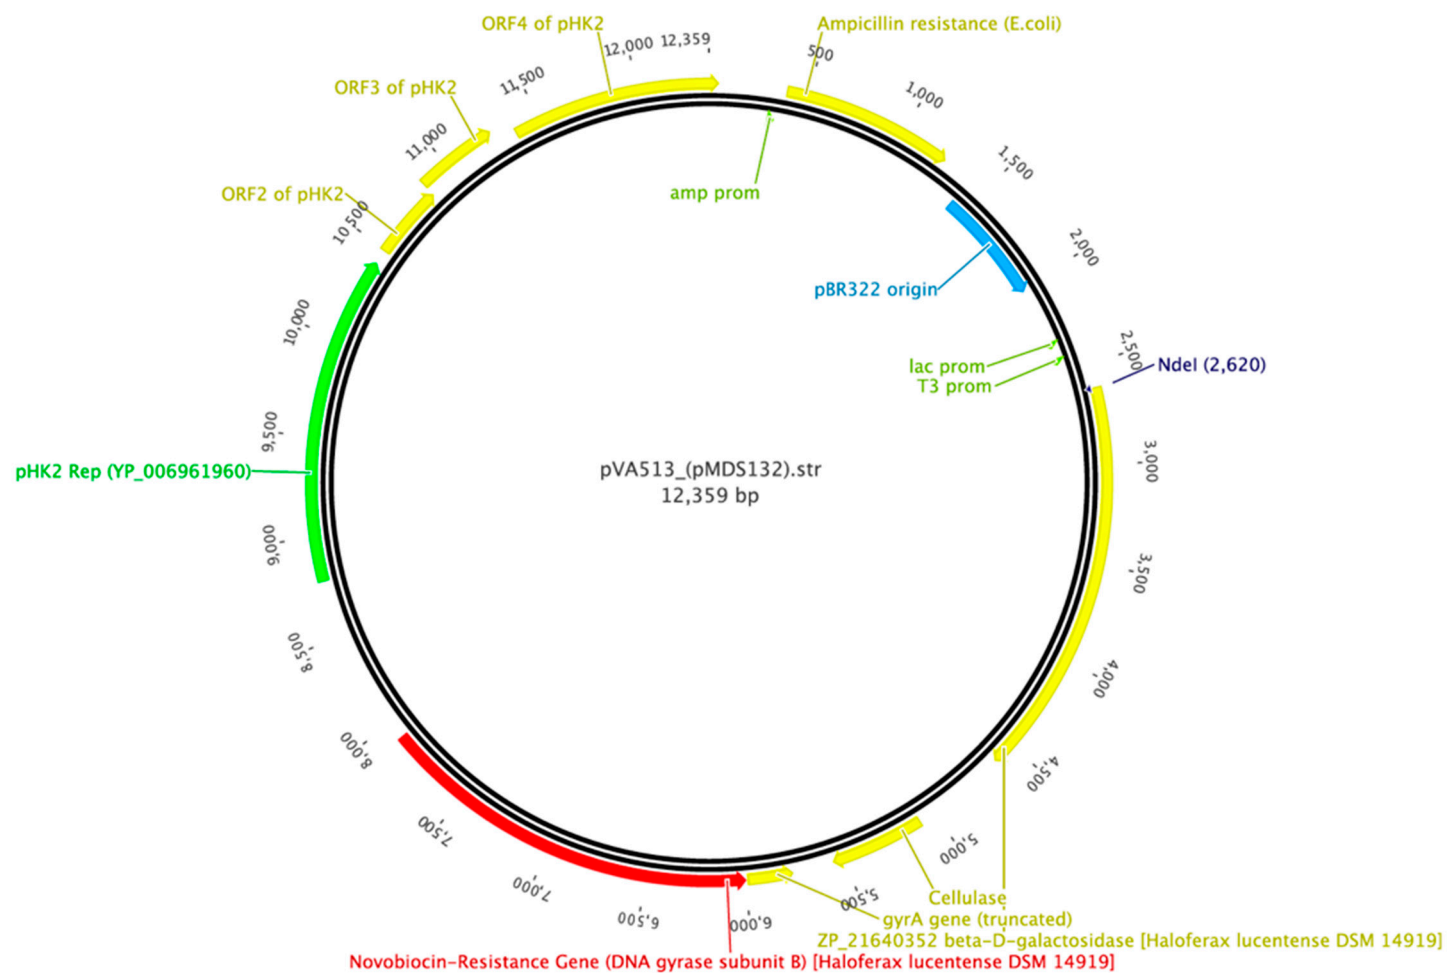

**Figure S1.** pVA513 halophilic expression vector, which was kindly provided by Mike Dyall-Smith (University of Melbourne, Australia).

## Reference

Serrano-Gomicia, J.A. Ciclo del glioxilato en el arquea halófilo *Haloferax volcanii*: análisis bioquímico, filogenético y transcripcional. Ph.D. Dissertation, University of Alicante, Spain. 2000.

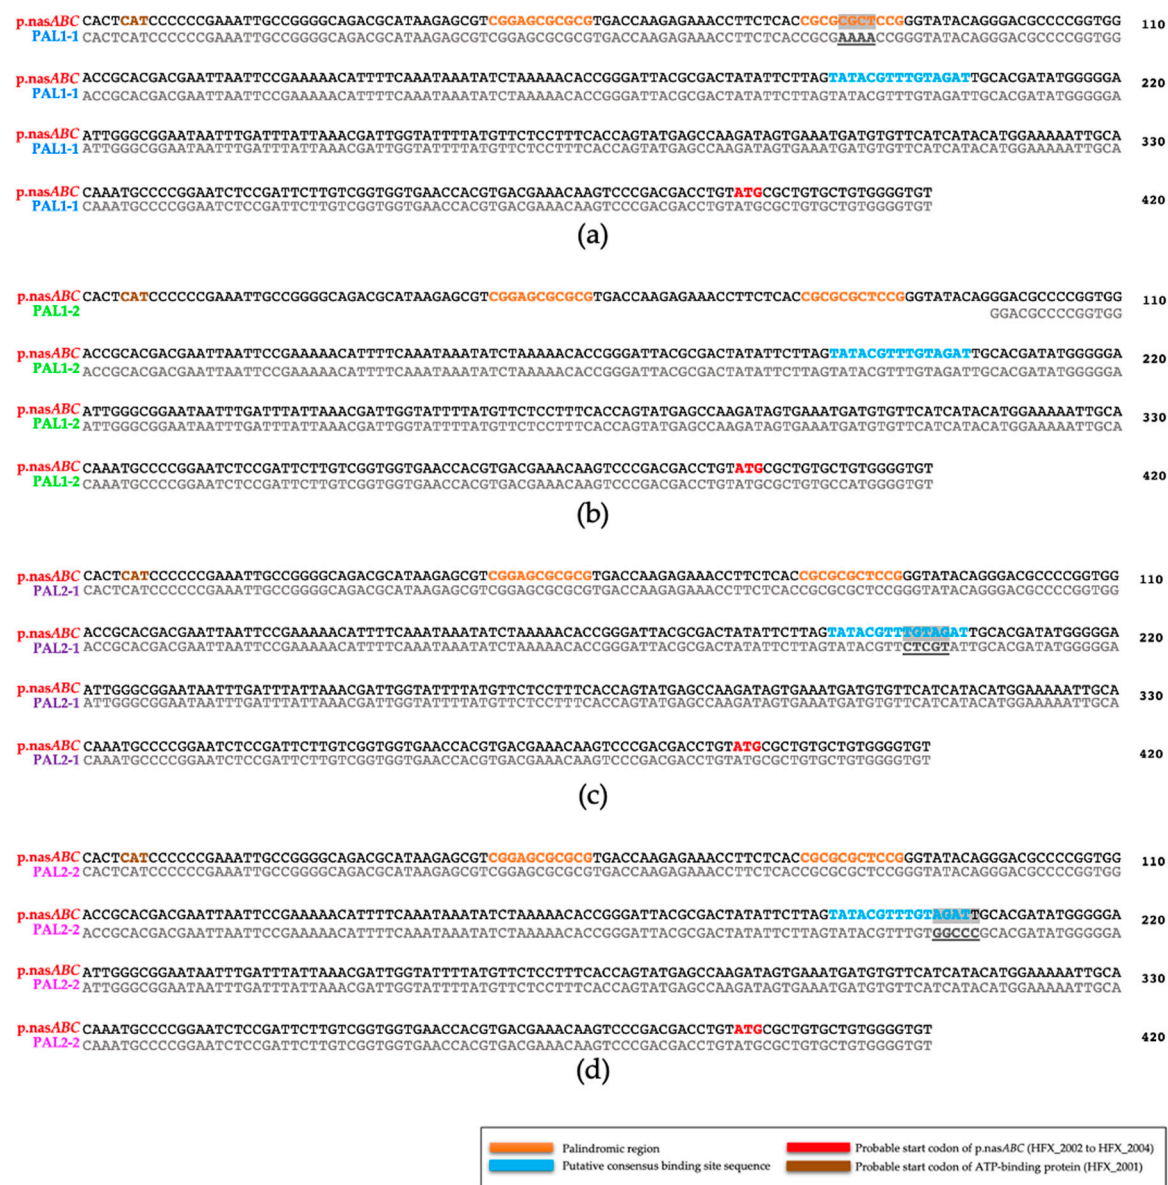

Figure S2. Sequence of promoter region in pVA-PAL1-1 (a), pVA-PAL1-2 (b), pVA-PAL2-1(c), and pVA-PAL2-2 (d).

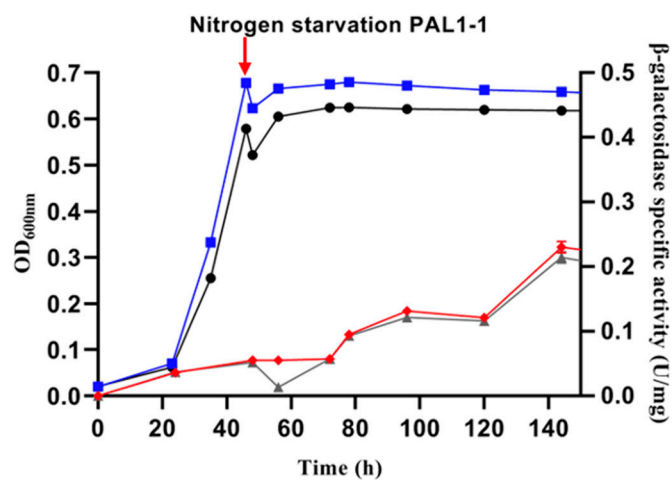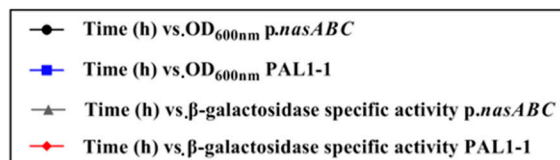

(a)

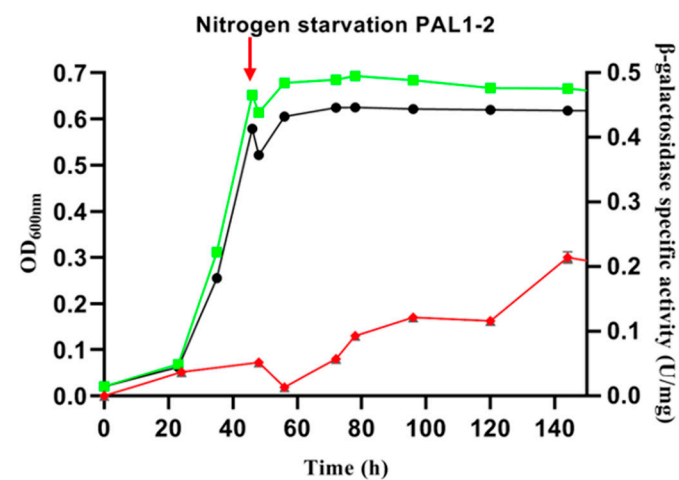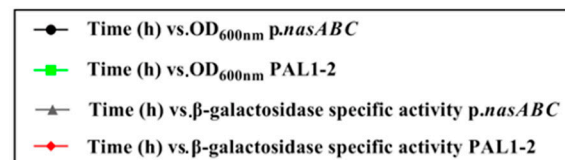

(b)

**Figure S3.** Cell growth, followed by measuring  $OD_{600nm}$ , and  $\beta$ -galactosidase specific activity, determined for *Hfx. mediterranei* *p.nasABC* PAL1-1 transformants (a) and PAL1-2 transformants (b) under nitrogen-starved conditions. Time point where nitrogen starvation starts is indicated with a red arrow.
